# Supplementary material for: A clinical drug candidate that triggers non-apoptotic cancer cell death
Source: Research Square preprint supplement (doi:10.21203/rs.3.rs-4138879/v1), 2025-02-11
Supplement: Supplementary file 1 [file 089bf46fc808c26f8aee223e.pdf]

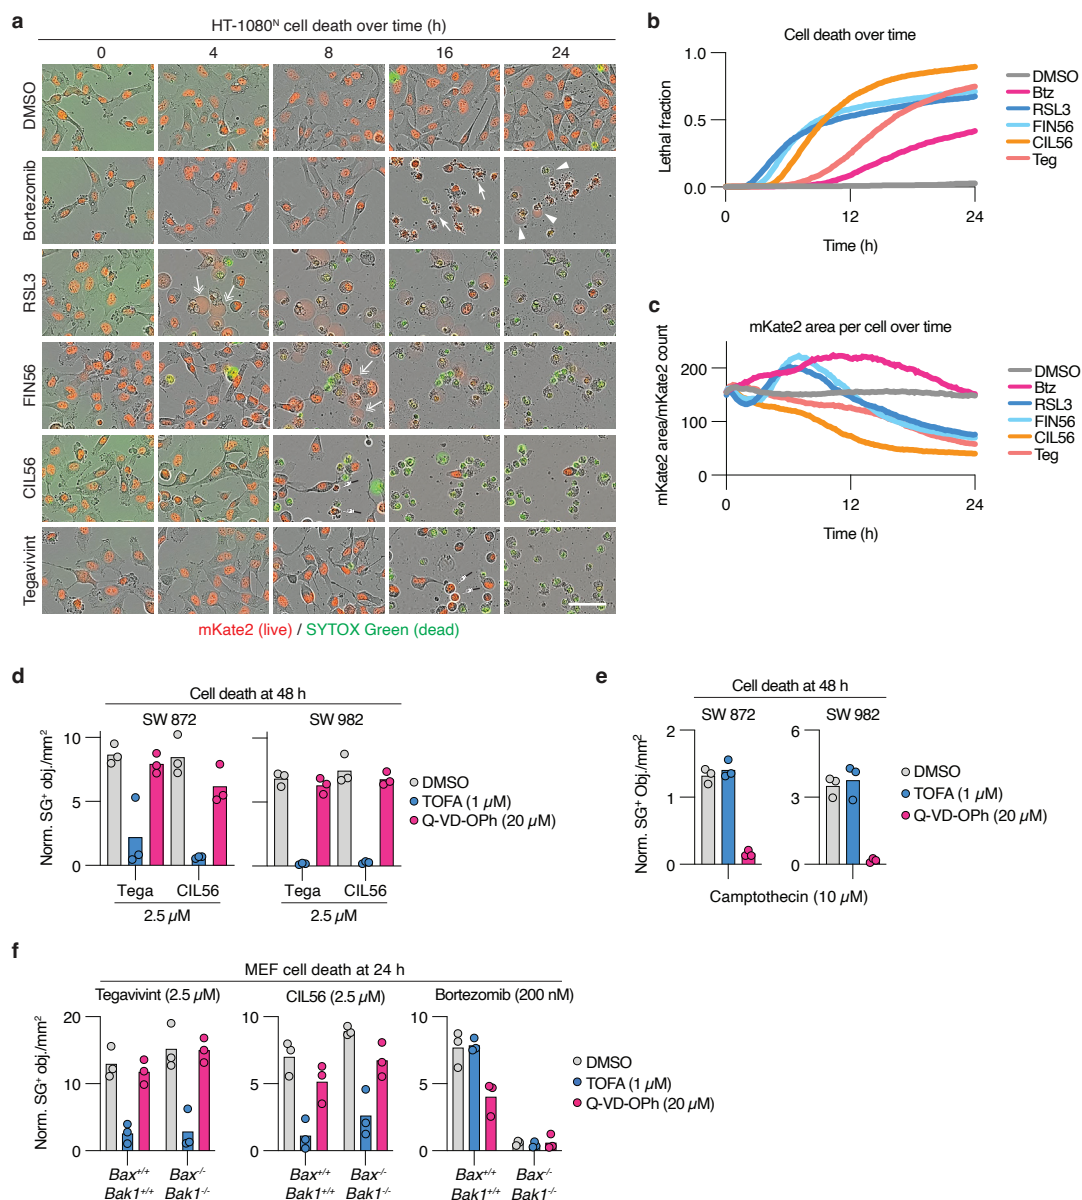

**Extended data Figure 1: Tegavivint and CIL56 cause a distinct cell death phenotype.** **a**, Extracted images from time-lapse movies. All compounds were used at 5 μM. Arrows indicate apoptotic blebs and bodies. Arrowheads indicate secondary necrosis. Double arrowheads indicate ferroptotic cell “ballooning”. Pointy hands indicate intact nuclei with retracted cytoplasm. Scale bar = 100 μm. **b**, Quantification of population cell death from the movies in **a**. **c**, Quantification of mKate2 area over mKate2-positive objects for the movies in **a**. Images and analyses are representative of nine separate movies from two independent experiments. **d**, Counts of SYTOX Green positive (SG<sup>+</sup>) objects (i.e., dead cells) determined by imaging. Cell confluence at the start of the experiment was used for normalization. Tega, tegavivint. **e**, Normalized counts of SG<sup>+</sup> dead cells. Camptothecin is a positive control inducer of apoptosis. **f**, Normalized counts of SG<sup>+</sup> dead cells. Results in **d** - **f** show individual datapoints from three separate experiments.
