# Supplementary material for: A clinical drug candidate that triggers non-apoptotic cancer cell death
Source: Research Square preprint supplement (doi:10.21203/rs.3.rs-4138879/v1), 2025-02-11
Supplement: Supplementary file 2 [file 737c74e883e44bdc69d24b7f.pdf]

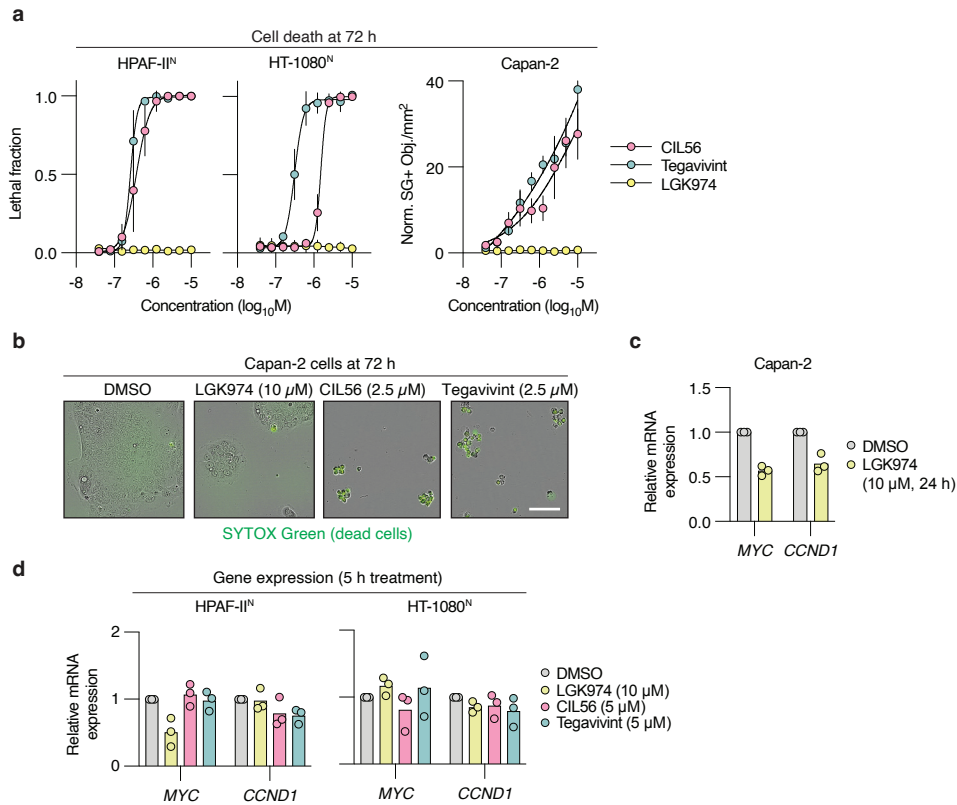

**Extended data Figure 8. Wnt pathway inhibition does not explain CIL56 or tegavivint lethality.** **a**, Cell death determined by imaging of live (nuclear mKate2-positive) and/or dead (SYTOX Green-positive) cells. When available, live and dead cell counts were integrated into the lethal fraction score (0 = all cells in the population alive, 1 = all cells in the population dead). Results represent mean  $\pm$  SD from three independent experiments. **b**, Images of cells treated as indicated in medium containing SG. Representative of three different experiments. Scale bar = 100  $\mu$ m. **c**, Relative mRNA expression determined using reverse transcription coupled to quantitative polymerase chain reaction (RT-qPCR) analysis. **d**, Relative mRNA expression determined using RT-qPCR analysis. Results in **c** and **d** represent individual datapoints from independent experiments.
