# Supplementary material for: A clinical drug candidate that triggers non-apoptotic cancer cell death
Source: Research Square preprint supplement (doi:10.21203/rs.3.rs-4138879/v1), 2025-02-11
Supplement: Supplementary file 3 [file 81e6193ff58ef3e75cecafe4.pdf]

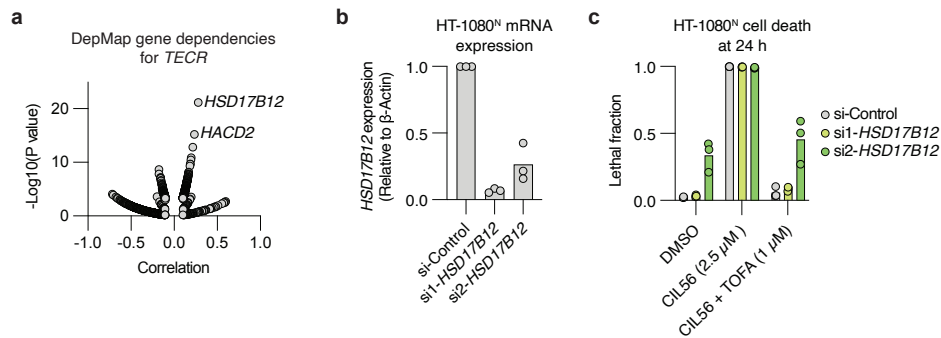

**Extended data Figure 5: TECR and lipid metabolism.** **a**, *TECR* gene dependency correlations from the DepMap resource (24Q2). **b**, Gene expression determined using reverse transcription coupled to quantitative polymerase chain reaction. **c**, Cell death determined by imaging of live (nuclear mKate2-positive) and dead (SYTOX Green-positive) cells. Live and dead cell counts were integrated into the lethal fraction score (0 = all cells in the population alive, 1 = all cells in the population dead). Results in **b** and **c** are individual datapoints from independent experiments.
