# Supplementary material for: A clinical drug candidate that triggers non-apoptotic cancer cell death
Source: Research Square preprint supplement (doi:10.21203/rs.3.rs-4138879/v1), 2025-02-11
Supplement: Supplementary file 4 [file 9cd73ff02a19889229cd3c8d.pdf]

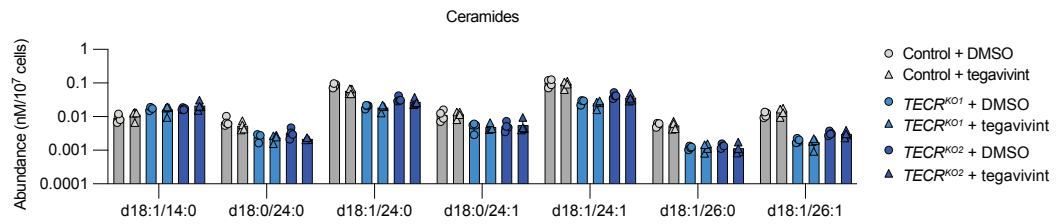

**Extended data Figure 7. Analysis of *TECR*-dependent lipid metabolism.** Changes in ceramide abundance determined using shotgun lipidomics. All species shown here were significantly altered (Adj.  $p < 0.1$ ) in DMSO-treated HT-1080<sup>N</sup> *TECR*<sup>KO1</sup> and *TECR*<sup>KO2</sup> cell lines versus the DMSO-treated Control cell line. d18:1/14:0 is increased in *TECR*<sup>KO1</sup> and *TECR*<sup>KO2</sup> cells versus Control cells, while the other lipids are decreased. Results represent individual datapoints from independent experiments.
