# Supplementary material for: A clinical drug candidate that triggers non-apoptotic cancer cell death
Source: Research Square preprint supplement (doi:10.21203/rs.3.rs-4138879/v1), 2025-02-11
Supplement: Supplementary file 5 [file 9d18a5b8b948bc6c2d5edb5d.pdf]

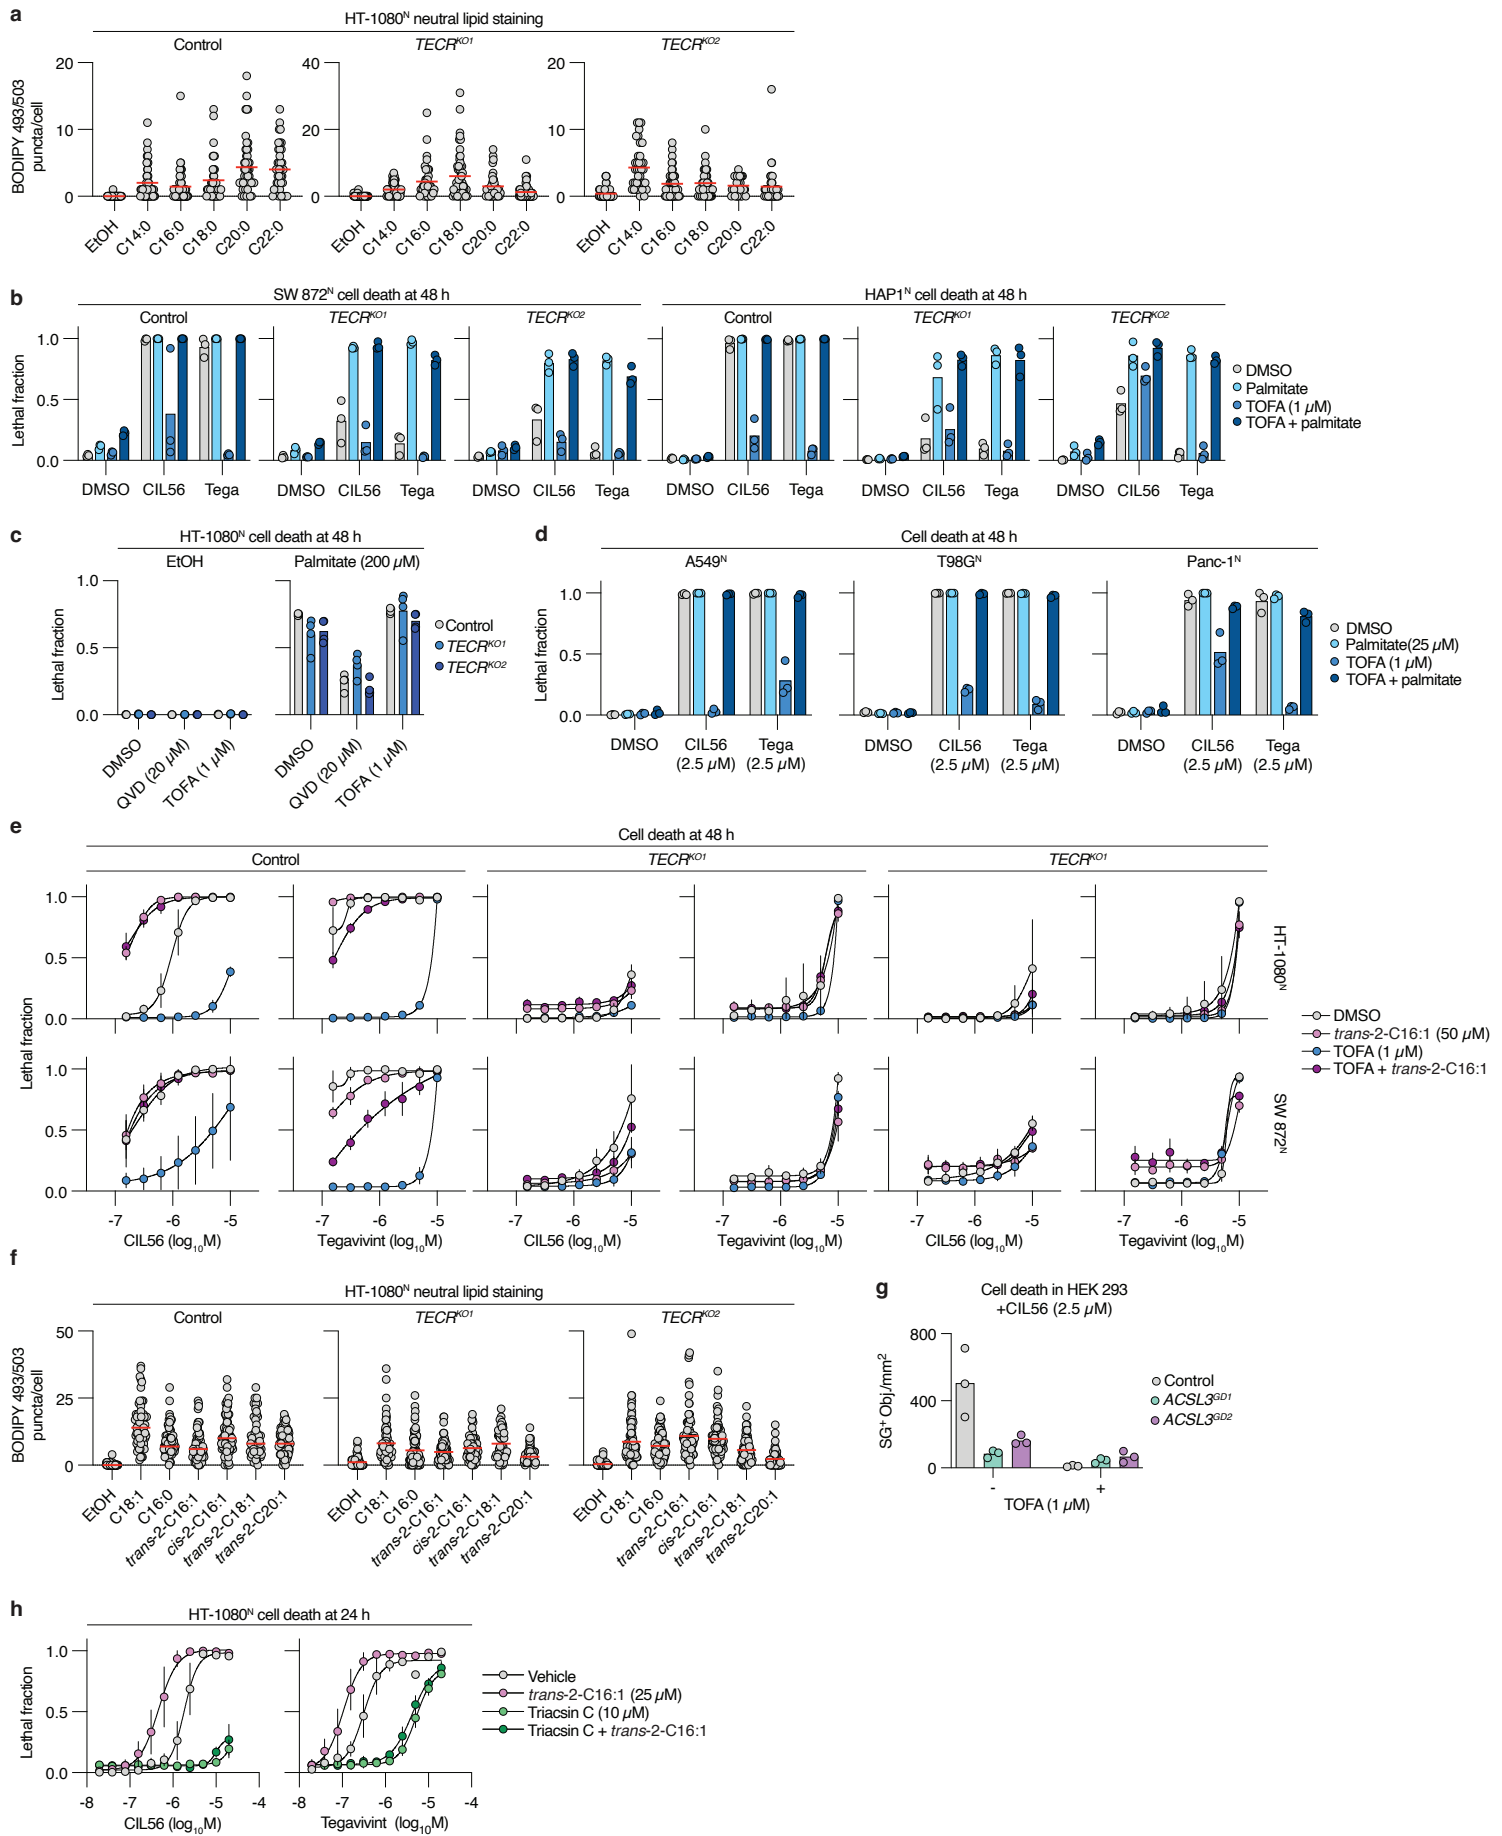

**Extended data Figure 6: TECR promotes palmitate-dependent cell death.** **a**, Quantification of neutral lipid staining. Each datapoint represents counts of BODIPY 493/503-positive puncta from one cell. Red bars are median values.  $n = 33 - 66$  cells per condition. Data are representative of one of three independent experiments. **b**, Cell death determined by imaging of live (nuclear mKate2-positive) and dead (SYTOX Green-positive) cells. Live and dead cell counts were integrated into the lethal fraction score (0 = all cells in the population alive, 1 = all cells in the population dead). CIL56 and tegavivint (Tega) were used at  $2.5 \mu\text{M}$  in SW 872<sup>N</sup> cells and  $5 \mu\text{M}$  in HAP1<sup>N</sup> cells. C16:0 (palmitate) was used at  $50 \mu\text{M}$  in SW 872<sup>N</sup> cells and  $100 \mu\text{M}$  in HAP1<sup>N</sup> cells. **c-e**, Cell death determined by imaging. **f**, Quantification of neutral lipid staining. Each datapoint represents counts of BODIPY 493/503-positive puncta from one cell. Red bars are median values.  $n = 44 - 90$  cells per condition. C18:1 (oleate) is used here as a positive control for the stimulation of neutral lipid synthesis. Data are representative of one of three independent experiments. **g**, Cell death determined by imaging of SYTOX Green positive (SG<sup>+</sup>) dead cells. **h**, Cell death determined by imaging. Results in **b-d**, and **g** show individual datapoints from independent experiments, while results in **e** and **h** are mean  $\pm$  SD from three independent experiments.
