# Supplementary material for: A clinical drug candidate that triggers non-apoptotic cancer cell death
Source: Research Square preprint supplement (doi:10.21203/rs.3.rs-4138879/v1), 2025-02-11
Supplement: Supplementary file 6 [file d4ef5ee6567f79b1c58a7398.pdf]

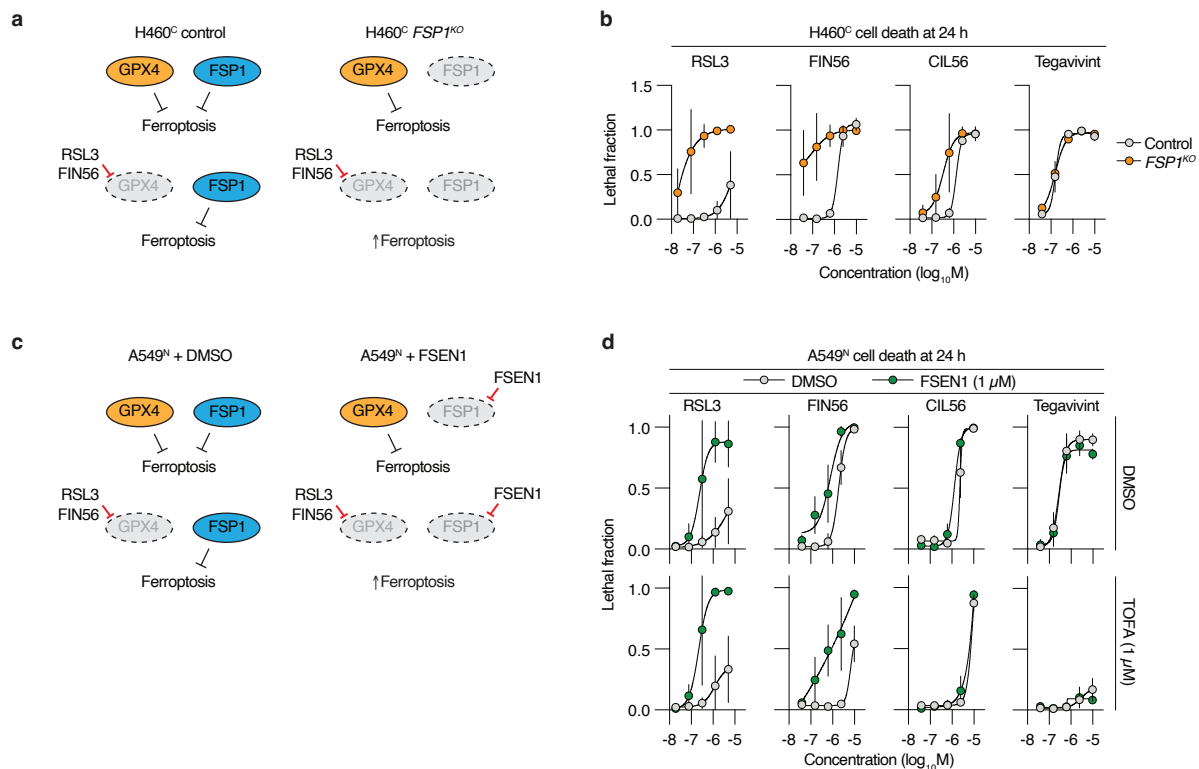

**Extended data Figure 2: Tegavivint and CIL56 do not inhibit GPX4.** **a**, Cartoon depiction of the redundancy between GPX4 and FSP1 and the effects of *FSP1* gene disruption ("KO") on sensitivity to known GPX4 inhibitors (RSL3 and FIN56). **b**, Cell death determined by imaging of live (nuclear mKate2-positive) and dead (SYTOX Green-positive) cells. Live and dead cell counts were integrated into the lethal fraction score (0 = all cells in the population alive, 1 = all cells in the population dead). **c**, Cartoon depiction of the redundancy between GPX4 and FSP1 and the effects of FSP1 pharmacological inhibition on sensitivity to known GPX4 inhibitors (RSL3 and FIN56). **d**, Cell death determined by time-lapse imaging. Results in **b** and **d** are mean  $\pm$  SD from three separate experiments.
