# Supplementary material for: A clinical drug candidate that triggers non-apoptotic cancer cell death
Source: Research Square preprint supplement (doi:10.21203/rs.3.rs-4138879/v1), 2025-02-11
Supplement: Supplementary file 7 [file e8f81d12c0fb77d85ad5a8b5.pdf]

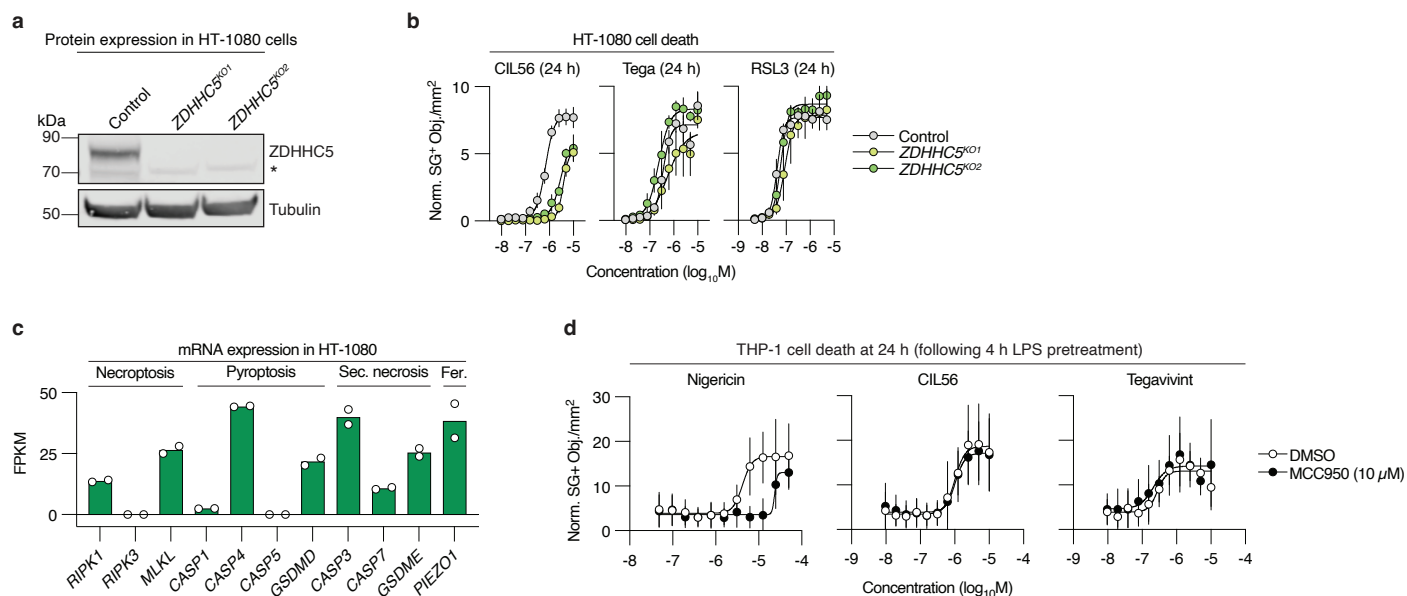

**Extended data Figure 3: CIL56 and tegavivint do not induce necroptosis or pyroptosis.** **a**, Protein abundance determined by immunoblotting. Images are representative of three experiments. **b**, Cell death determined by imaging of SYTOX Green positive (SG<sup>+</sup>) dead cells. Cell confluence at the start of the experiment was used for normalization. **c**, Published mRNA expression data determined by RNA sequencing. Results are expressed as Fragments Per Kilobase of transcript per Million mapped reads (FPKM). Individual datapoints from two independent experiments are shown. Genes associated with different lethal mechanisms are indicated. Sec. necrosis, secondary necrosis; Fer., ferroptosis. **d**, Cell death determined by imaging of SG<sup>+</sup> dead cells. Cell confluence at the start of the experiment was used for normalization. Results in **b** and **d** are mean  $\pm$  SD from three separate experiments.
