# Supplementary material for: A clinical drug candidate that triggers non-apoptotic cancer cell death
Source: Research Square preprint supplement (doi:10.21203/rs.3.rs-4138879/v1), 2025-02-11
Supplement: Supplementary file 8 [file f4a94475eef5de918f2c951a.pdf]

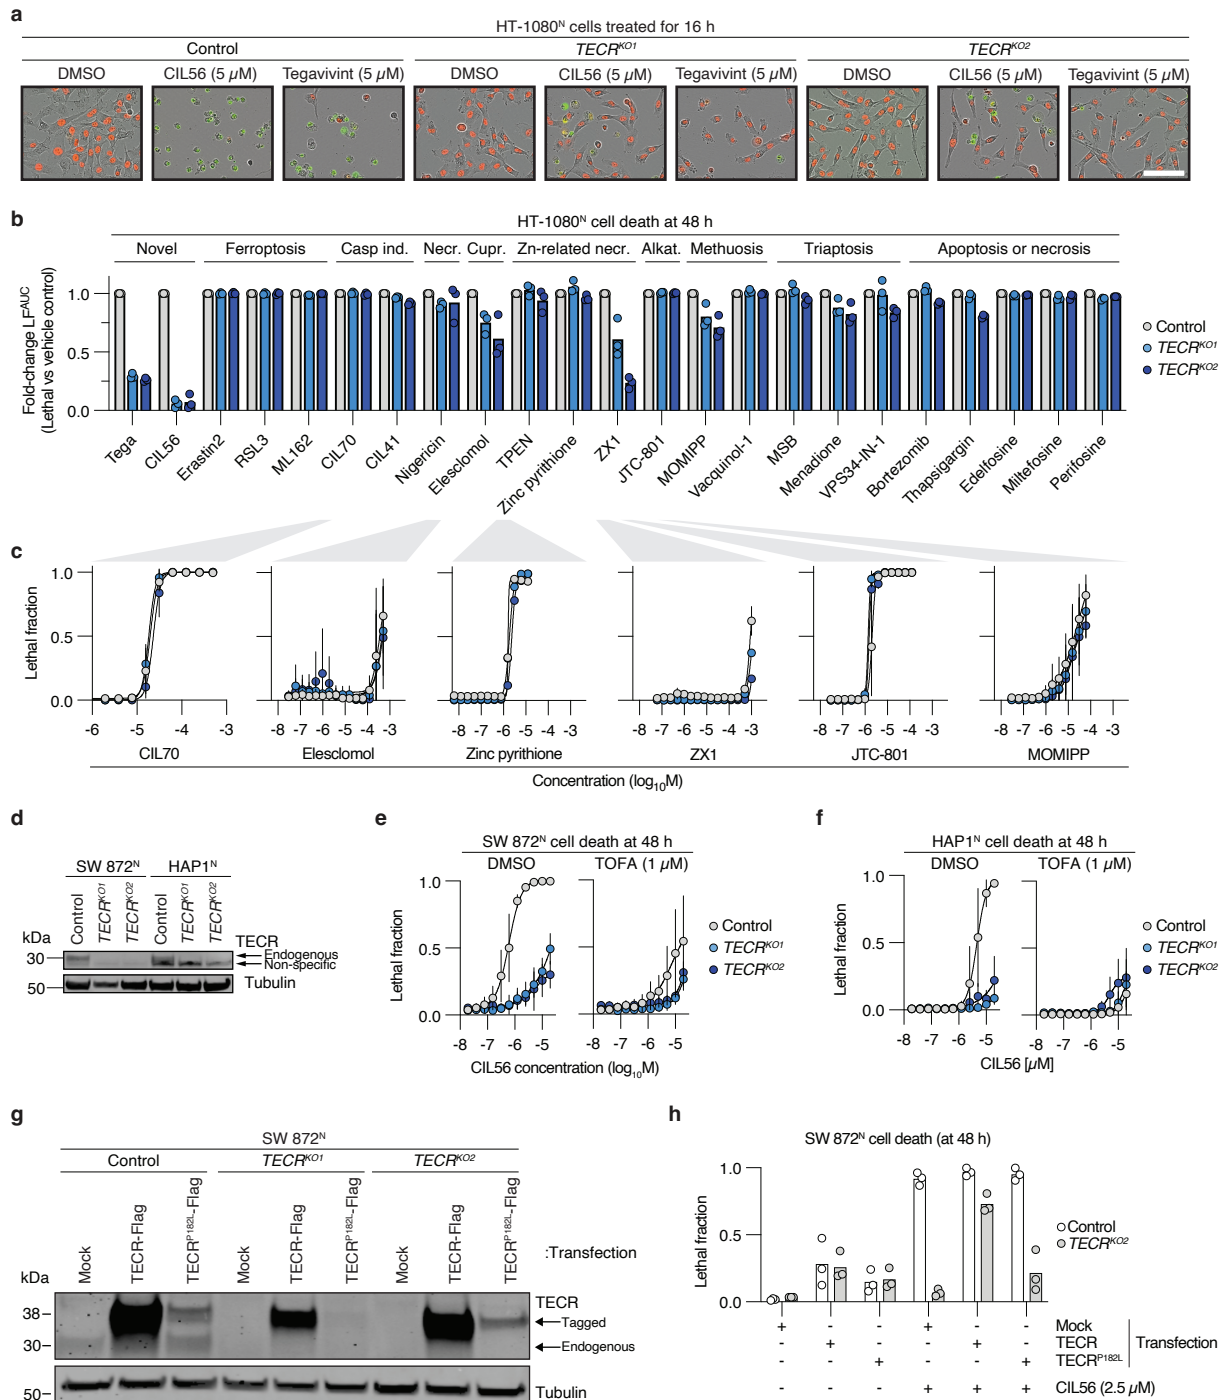

**Extended data Figure 4: *TECR* is required for cell death in response to CIL56 and tegavivint.** **a**, Images of compound-treated cells. Representative of two technical replicates. **b**, Cell death determined by imaging of live (nuclear mKate2-positive) and dead (SYTOX Green-positive) cells. Live and dead cell counts were integrated into the lethal fraction (LF) score at 48 h, then LF scores were integrated across compound doses as area under the curve (AUC) values. LF<sup>AUC</sup> values for each lethal compound were normalized to effects observed in Control cells. Compounds are grouped roughly by functional class. Casp. ind.: caspase independent, Necr.: necrosis, Cupr.: cuproptosis, Alkal.: alkaliptosis. **c**, Cell death determined using imaging (0 = all cells in the population alive, 1 = all cells in the population dead). Note that these results are an expansion of the same data presented in **b**. **d**, Protein abundance determined by immunoblotting. Images are representative of three experiments. **e**, Cell death determined by imaging. **f**, Cell death determined by imaging. **g**, Analysis of protein abundance by immunoblotting. **h**, Cell death determined using imaging. Results in **b** and **h** are individual datapoints from separate experiments. Results in **c**, **e** and **f** are mean  $\pm$  SD from three separate experiments.
